# Supplementary material for: Androgen deprivation upregulates SPINK1 expression and potentiates cellular plasticity in prostate cancer
Source: PubMed Central journal article supplement (PMC6971084; doi:10.1038/s41467-019-14184-0), 2020-01-20
Supplement: 41467_2019_14184_MOESM1_ESM.pdf [file 41467_2019_14184_MOESM1_ESM.pdf]

## **Supplementary Information**

### **Androgen deprivation upregulates SPINK1 expression and potentiates cellular plasticity in prostate cancer**

Ritika Tiwari<sup>1,†</sup>, Nishat Manzar<sup>1,†</sup>, Vipul Bhatia<sup>1</sup>, Anjali Yadav<sup>1</sup>, Mushtaq A. Nengroo<sup>2</sup>, Dipak Datta<sup>2</sup>, Shannon Carskadon<sup>3</sup>, Nilesh Gupta<sup>4</sup>, Michael Sigouros<sup>5</sup>, Francesca Khani<sup>6</sup>, Matti Poutanen<sup>7</sup>, Amina Zoubeidi<sup>8</sup>, Himisha Beltran<sup>9</sup>, Nallasivam Palanisamy<sup>3</sup>, Bushra Ateeq<sup>1\*</sup>

<sup>1</sup>Molecular Oncology Laboratory, Department of Biological Sciences and Bioengineering, Indian Institute of Technology Kanpur, Kanpur, 208016, U.P., India;

<sup>2</sup>Division of Cancer Biology, CSIR-Central Drug Research Institute, Lucknow, 226031, U.P., India;

<sup>3</sup>Vattikuti Urology Institute, Department of Urology, Henry Ford Health System, Detroit, MI 48202, USA;

<sup>4</sup>Department of Pathology, Henry Ford Health System, Detroit, MI 48202, USA;

<sup>5</sup>Division of Medical Oncology, Weill Cornell Medicine, New York, NY 10065, USA;

<sup>6</sup>Department of Pathology and Laboratory Medicine, Weill Cornell Medicine, New York, NY, 10065, USA;

<sup>7</sup>Institute of Biomedicine, Research Centre for Integrative Physiology and Pharmacology, University of Turku, Turku, Finland;

<sup>8</sup>Vancouver Prostate Centre and Department of Urologic Sciences, University of British Columbia, Vancouver BC, Canada;

<sup>9</sup>Department of Medical Oncology, Dana Farber Cancer Institute, Harvard Medical School, Boston, MA 02215, USA

<sup>†</sup>These authors contributed equally to this work.

**Keywords:** Prostate Cancer; ADT; SPINK1; AR; REST; SOX2; NEPC.

**Financial support:** This work is supported by the Wellcome Trust/ DBT India Alliance grant (IA/I(S)/12/2/500635 to BA).

**\*Corresponding Author:**

Bushra Ateeq, Ph.D.

Molecular Oncology Laboratory,

Department of Biological Sciences and Bioengineering,

Indian Institute of Technology Kanpur,

Kanpur, 208016, U.P., INDIA

Phone: +91 512 2594083

Fax: +91 512 2594010

Email: [bushra@iitk.ac.in](mailto:bushra@iitk.ac.in)

## Supplementary Figure 1

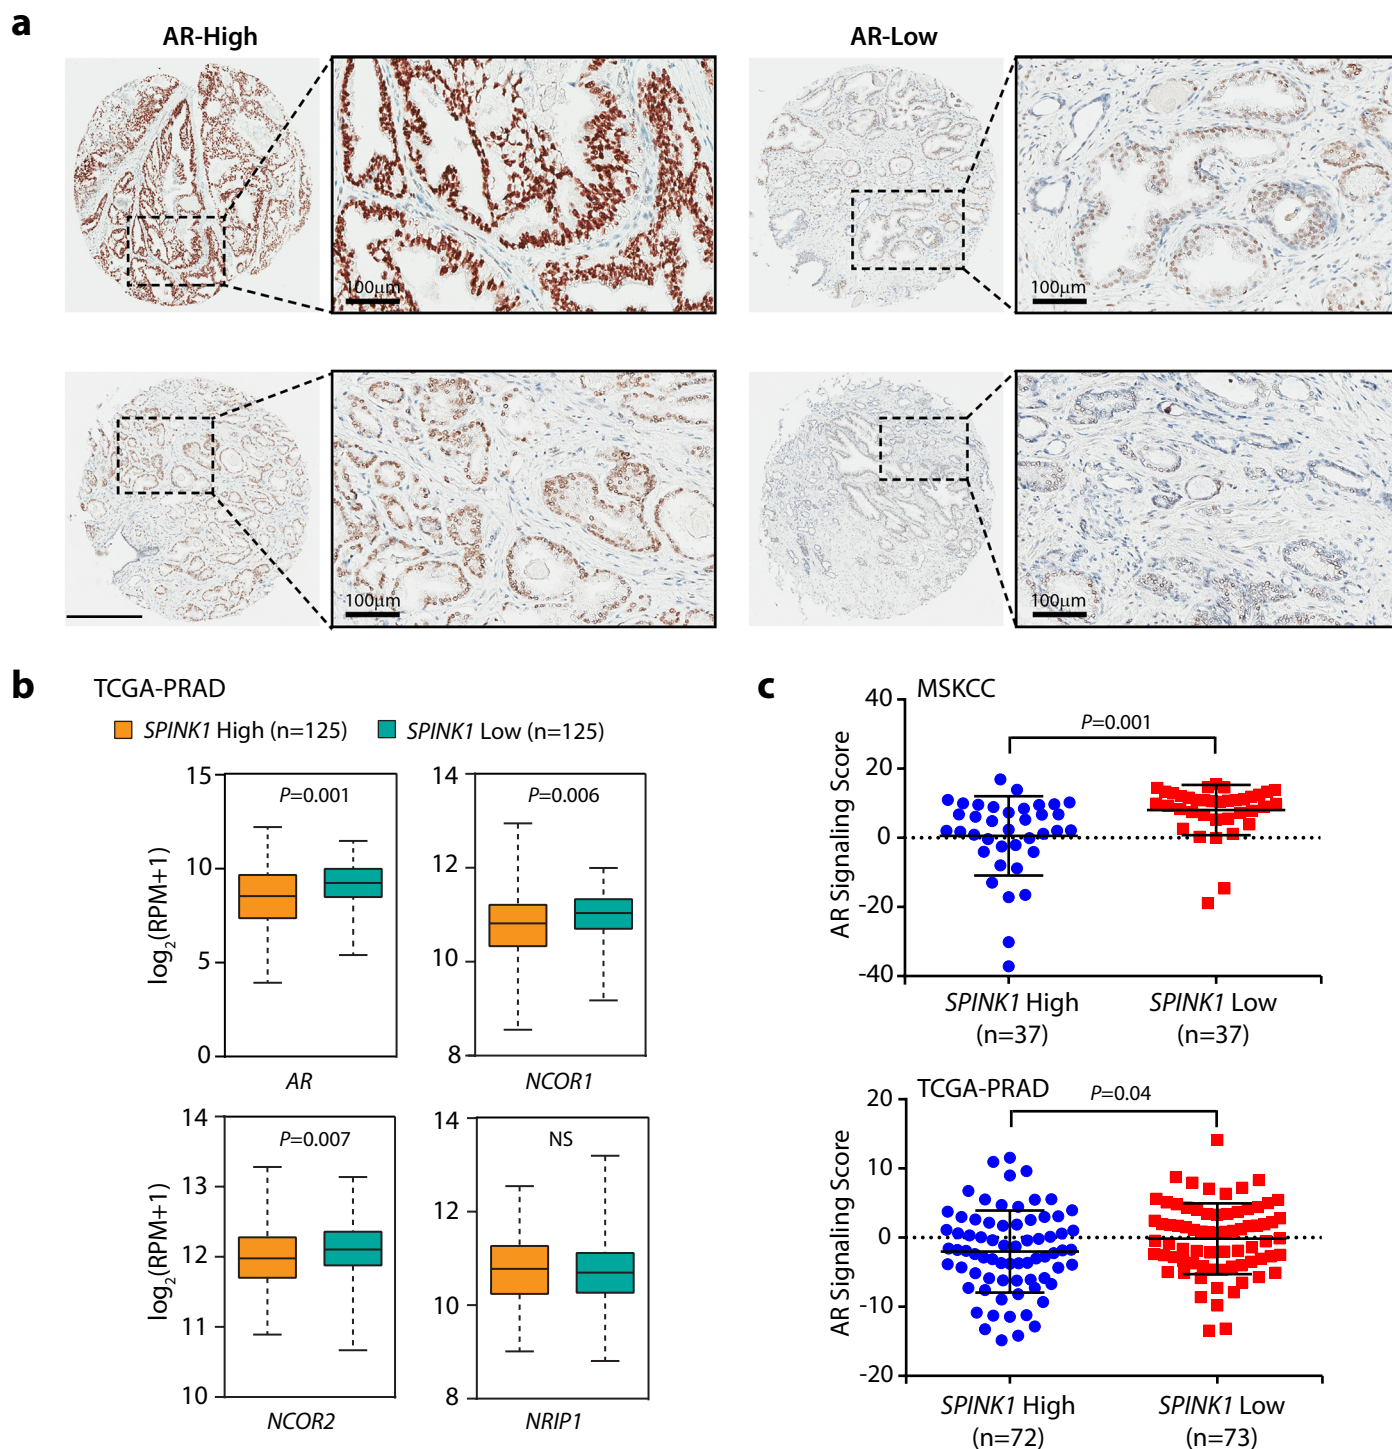

### Supplementary Figure 1. *SPINK1* expression is negatively correlated with AR and members of AR repressive complex in PCa patients.

(a) Representative micrographs showing immunohistochemical (IHC) staining for AR in PCa tissue microarray (TMA) cores (n=237) wherein based on intensity, AR staining is categorized as high (Gleason score 8), medium (Gleason score 7), low (Gleason score 7) and negative (Gleason score 7). Scale bar represents 500  $\mu\text{m}$  and 100  $\mu\text{m}$  for the entire core and the inset, respectively. (b) Relative expression of the members of AR repressive complex (*AR*, *NCOR1*, *NCOR2* and *NRIP1*) in *SPINK1* high (n=125) and low (n=125) PCa patients, stratified by employing quartile-based normalization of *SPINK1* expression in TCGA-PRAD dataset. Transcripts level shown as  $\log_2(\text{RPM}+1)$ . (c) Dot plot depicting inverse association between AR signaling score and *SPINK1* expression in the MSKCC (n=74; top) and TCGA-PRAD datasets (n=145; bottom) in *SPINK1* high and low PCa patients, stratified by employing quartile-based normalization of *SPINK1* expression. AR signaling score represents the mean expression of 10-gene signatures linked to AR signaling.

Data for panel (b) is presented as box-and-whisker plots with median, where the box extends from 25<sup>th</sup>-75<sup>th</sup> percentile, and whiskers ranges from minimum and maximum values. For panel (c) data is presented as scatter plots with mean  $\pm$  SD. Statistical significance for panels (b, c) was calculated using two-tailed unpaired Student's *t*-test.

## Supplementary Figure 2

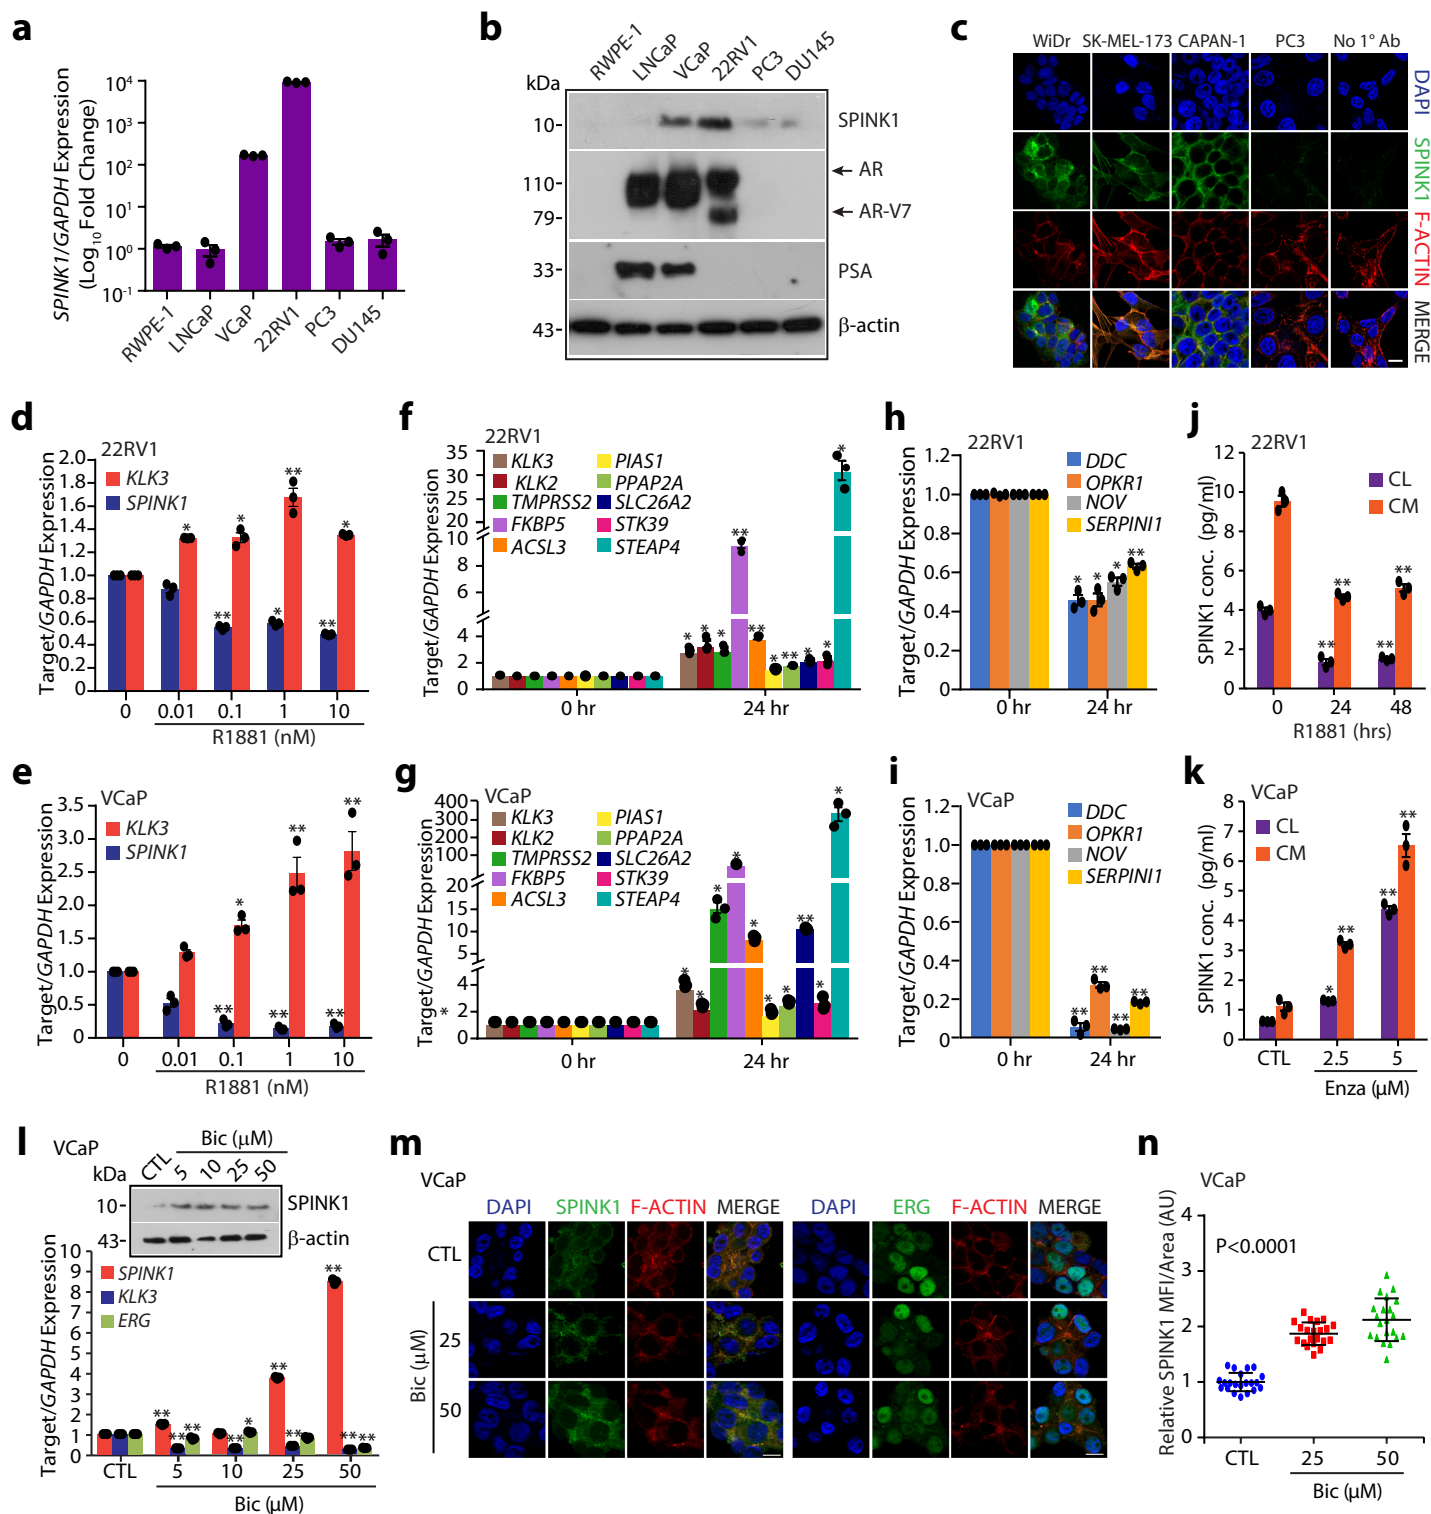

### Supplementary Figure 2. SPINK1 expression is negatively regulated by androgen signaling in PCa cells.

(a) QPCR data showing relative expression of *SPINK1* in the PCa cell lines panel. (b) Same as in (a), except immunoblot analysis showing *SPINK1*, AR and PSA expression.  $\beta$ -actin was used as a loading control. (c) Immunostaining for *SPINK1* in *SPINK1*-positive (WiDr, SK-MEL-173 and CAPAN-1) and *SPINK1*-negative (PC3) cell line, 22RV1 cells were used for no primary ( $1^\circ$ ) antibody control. Scale bar represents 10 $\mu$ m. (d) QPCR data showing relative expression of *SPINK1* and *KLK3* in 22RV1 cells stimulated with R1881 at various concentrations. (e) Same as in (d) except, VCaP cells were used. (f) QPCR data showing relative expression of androgen activated genes in R1881 (10 nM) stimulated 22RV1 cells. (g) Same as in (f), except VCaP cells were used. (h) QPCR data showing relative expression of androgen repressed genes in R1881 (10 nM) stimulated 22RV1 cells. (i) Same as in (h), except VCaP cells were used. (j) Quantification of *SPINK1* levels in the cell lysate (CL) and conditioned media (CM) of 22RV1 cells treated with R1881 (10nM), determined using enzyme-linked immunosorbent assay (ELISA). (k) Same as in (j) except, VCaP cells treated with enzalutamide. (l) QPCR data showing relative expression of *SPINK1*, *KLK3* and *ERG* in bicalutamide treated VCaP cells. Immunoblot analysis showing *SPINK1* expression in the same cells (top).  $\beta$ -actin was used as a loading control. (m) Immunostaining for *SPINK1* and *ERG* using same cells as in (l). F-actin and nucleus was stained using TRITC-phalloidin and DAPI respectively. Scale bar represents 10 $\mu$ m. (n) Quantification of *SPINK1* immunofluorescence images of same cells as in (m), represented as mean  $\pm$  SD using ten fields per condition.

Experiments were performed with  $n=3$  biologically independent samples; data represents mean $\pm$ SEM. For panels (d, e, j, k, l) two-way ANOVA, Dunnett's multiple comparison test; (f-i) two-tailed unpaired Student's *t*-test; (n) one-way ANOVA, Tukey's multiple comparison test was applied.  $*P \leq 0.05$  and  $**P \leq 0.001$ . Source data for (b, l) are provided as a Source Data file.

## Supplementary Figure 3

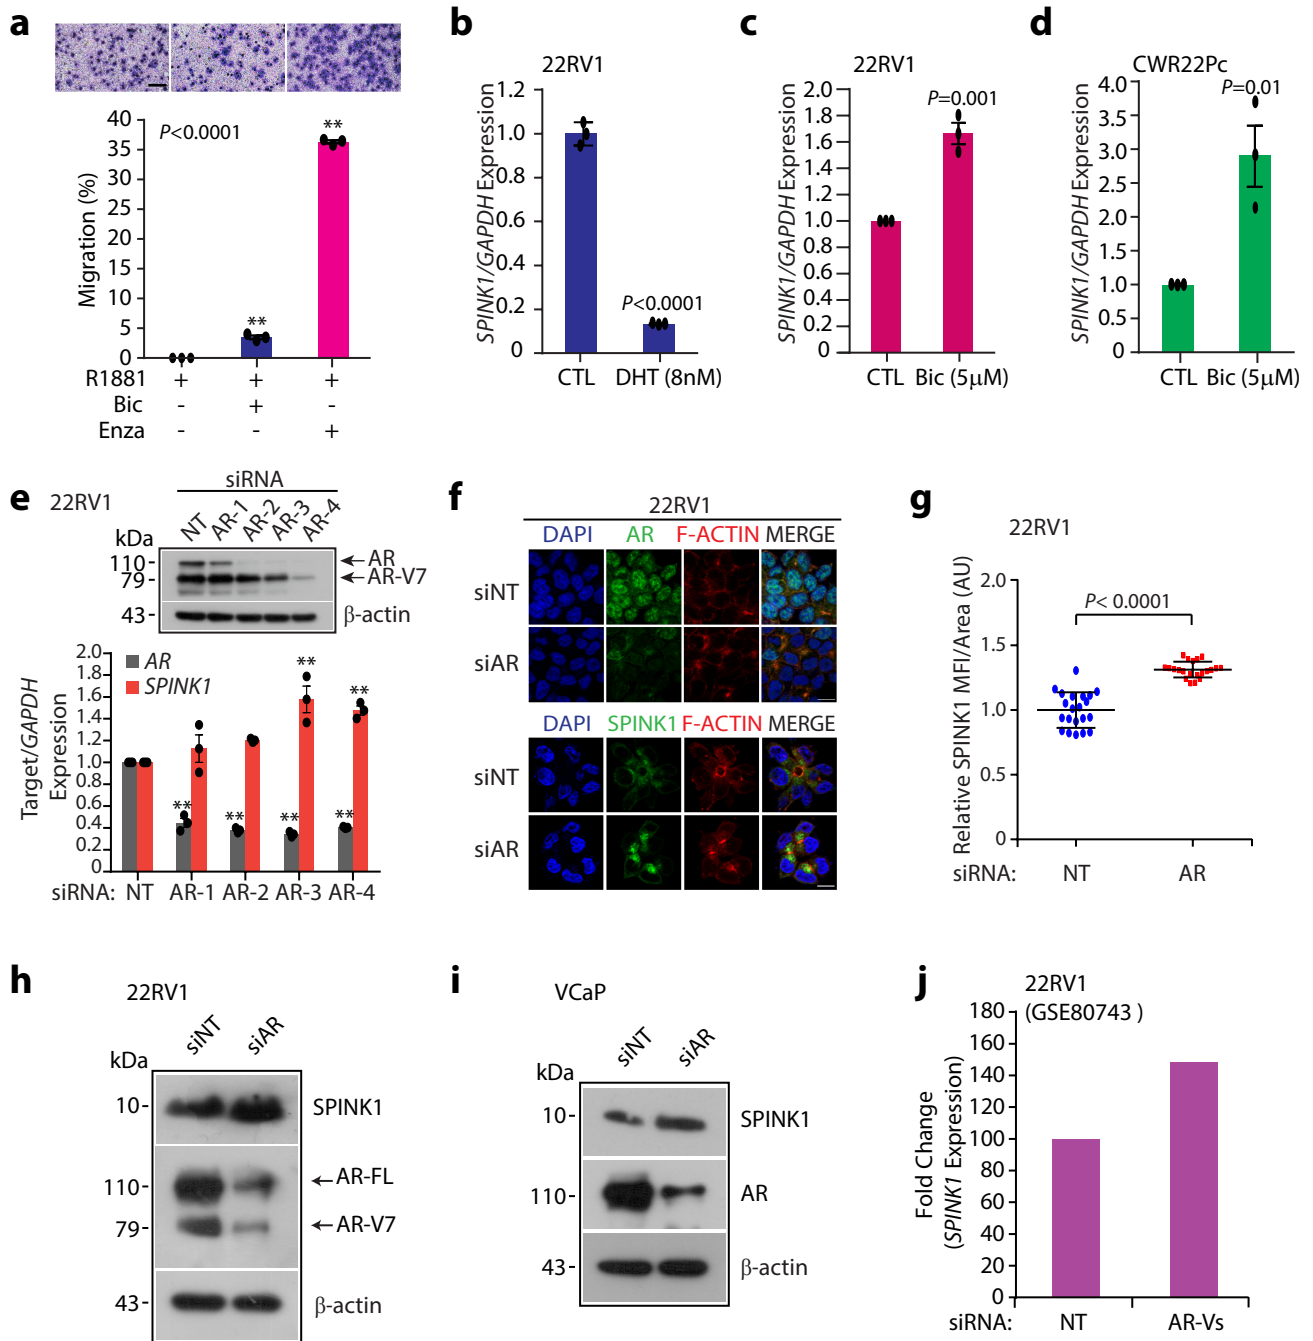

### Supplementary Figure 3. Androgen signaling negatively regulates SPINK1 expression in PCa cells.

(a) Bar plot showing boyden chamber Matrigel invasion assay using bicalutamide (50μM) and enzalutamide (10μM) treated VCaP cells with or without androgen (R1881; 10nM) stimulation. Scale bar represents 200μm. (b) QPCR data showing relative expression of *SPINK1* in 22RV1 cells cultured in the presence of androgen (8 nM DHT) for 2 months. (c) Same as in (b), except 22RV1 cells were cultured in the presence of bicalutamide (5μM) for 2 months. (d) Same as in (c), except CWR22Pc cells were used. (e) QPCR data showing relative expression of *AR* and *SPINK1* in siRNA mediated *AR* silenced 22RV1 cells with respect to control cells (NT). Immunoblot analysis for *AR* levels using same cells (top). β-actin was used as a loading control. (f) Immunostaining for *AR* and *SPINK1* in siRNA mediated *AR* silenced 22RV1 cells with respect to control. F-actin and nucleus was stained using TRITC-phalloidin and DAPI respectively. Scale bar represents 10μm. (g) Quantification of *SPINK1* immunofluorescence images using same cells as in (f), data represented as mean±SD using ten fields per condition. (h) Immunoblot analysis for *SPINK1* and *AR* level in siRNA mediated *AR* silenced 22RV1 cells with respect to control. β-actin was used as a loading control. (i) Same as in (h), except siRNA mediated *AR* silenced VCaP cells were used. (j) Bar graph showing fold change of *SPINK1* expression in 22RV1 cells with siRNA mediated knock-down of *AR* splice variants (*AR-V1*, *AR-V3*, *AR-V4* and *AR-V7*) as compared to the control (NT) (GSE80473).

Experiments were performed with n=3 biologically independent samples; data represents mean±SEM. For panel (a) one-way ANOVA, Dunnett's multiple comparison test; (b-d, g) two-tailed unpaired Student's *t*-test; (e) two-way ANOVA, Dunnett's multiple comparison test was applied. \**P*≤ 0.05 and \*\**P*≤ 0.001. For panel (g) scatter plots are represented as mean±SD. Source data for (e, h, i) are provided as a Source Data file.

## Supplementary Figure 4

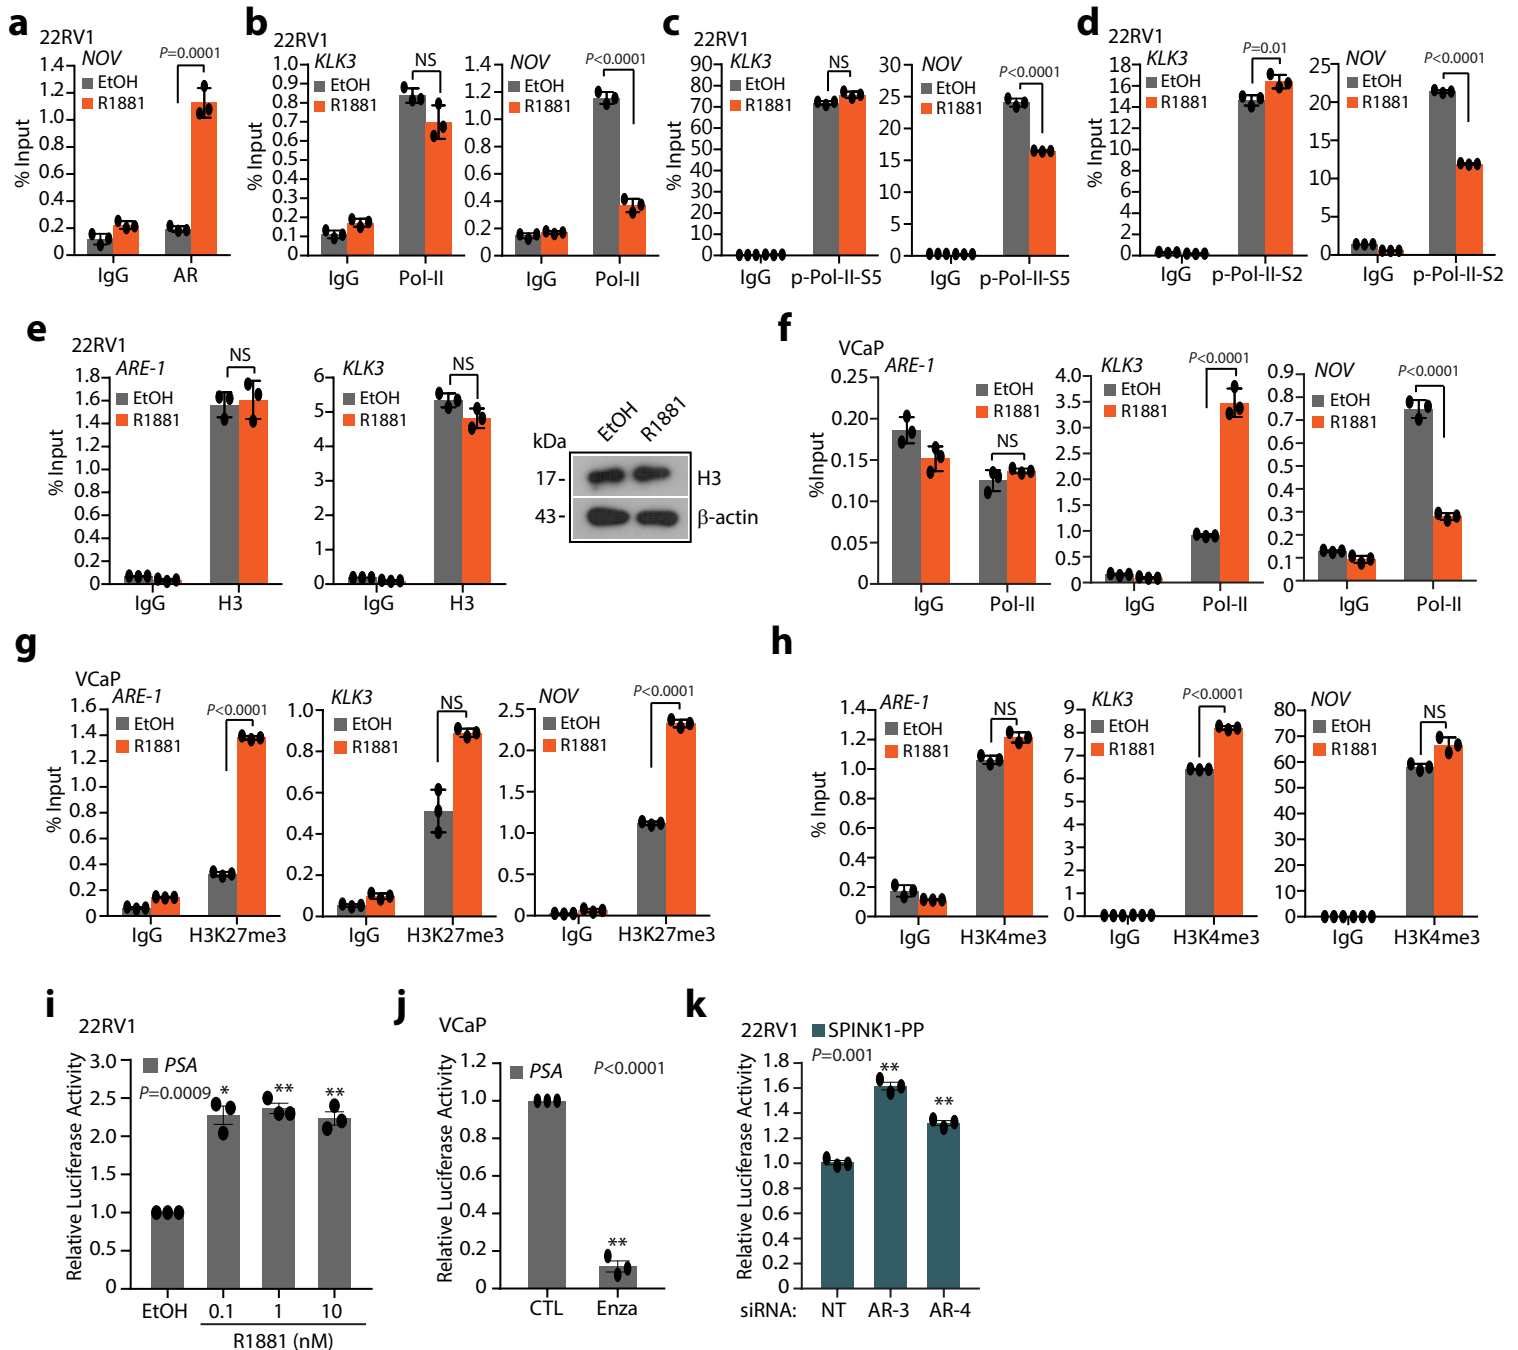

### Supplementary Figure 4. AR is recruited on *SPINK1* promoter upon androgen stimulation.

(a) ChIP-qPCR data for AR occupancy on the *NOV* promoter in androgen (R1881; 10 nM) stimulated 22RV1 cells. (b) Same cells as in (a) except, ChIP-qPCR for RNA Pol II occupancy on the *KLK3* and *NOV* promoter. (c) Same cells as in (a) except, ChIP-qPCR for RNA Pol II Ser5 phosphorylation on the *KLK3* and *NOV* promoter. (d) Same cells as in (a) except, ChIP-qPCR for RNA Pol II Ser2 phosphorylation on the *KLK3* and *NOV* promoter. (e) Same cells as in (a) except, ChIP-qPCR for total Histone H3 (H3) on the *SPINK1* and *KLK3* promoter. Immunoblot analysis for H3 levels (right panel).  $\beta$ -actin was used as a loading control. (f) ChIP-qPCR data for RNA Pol II occupancy on the *SPINK1*, *KLK3* and *NOV* promoter in androgen (R1881; 10 nM) stimulated VCaP cells. (g) Same cells as in (f) except, ChIP-qPCR for presence of Histone 3 lysine 27 trimethylation (H3K27me3) marks on the *SPINK1*, *KLK3* and *NOV* promoters. (h) Same cells as in (f) except, ChIP-qPCR for Histone 3 lysine 4 trimethylation (H3K4me3) marks on the *SPINK1*, *KLK3* and *NOV* promoters. (i) Luciferase reporter activity of *PSA* promoter construct in 22RV1 cells treated with different concentrations of R1881. (j) Same as in (i) except, enzalutamide (10  $\mu$ M) treated VCaP cells. (k) Same as in (i) except, proximal promoter of *SPINK1* (*SPINK1*-PP) using siRNA mediated *AR* knockdown 22RV1 cells.

Experiments were performed with n=3 biologically independent samples; data represents mean  $\pm$  SEM. For panels (a-h, j) two-tailed unpaired Student's *t*-test; (i, k) one-way ANOVA, Dunnett's multiple comparison test were applied. \* $P \leq 0.05$  and \*\* $P \leq 0.001$ . Source data for (e) is provided as a Source Data file.

## Supplementary Figure 5

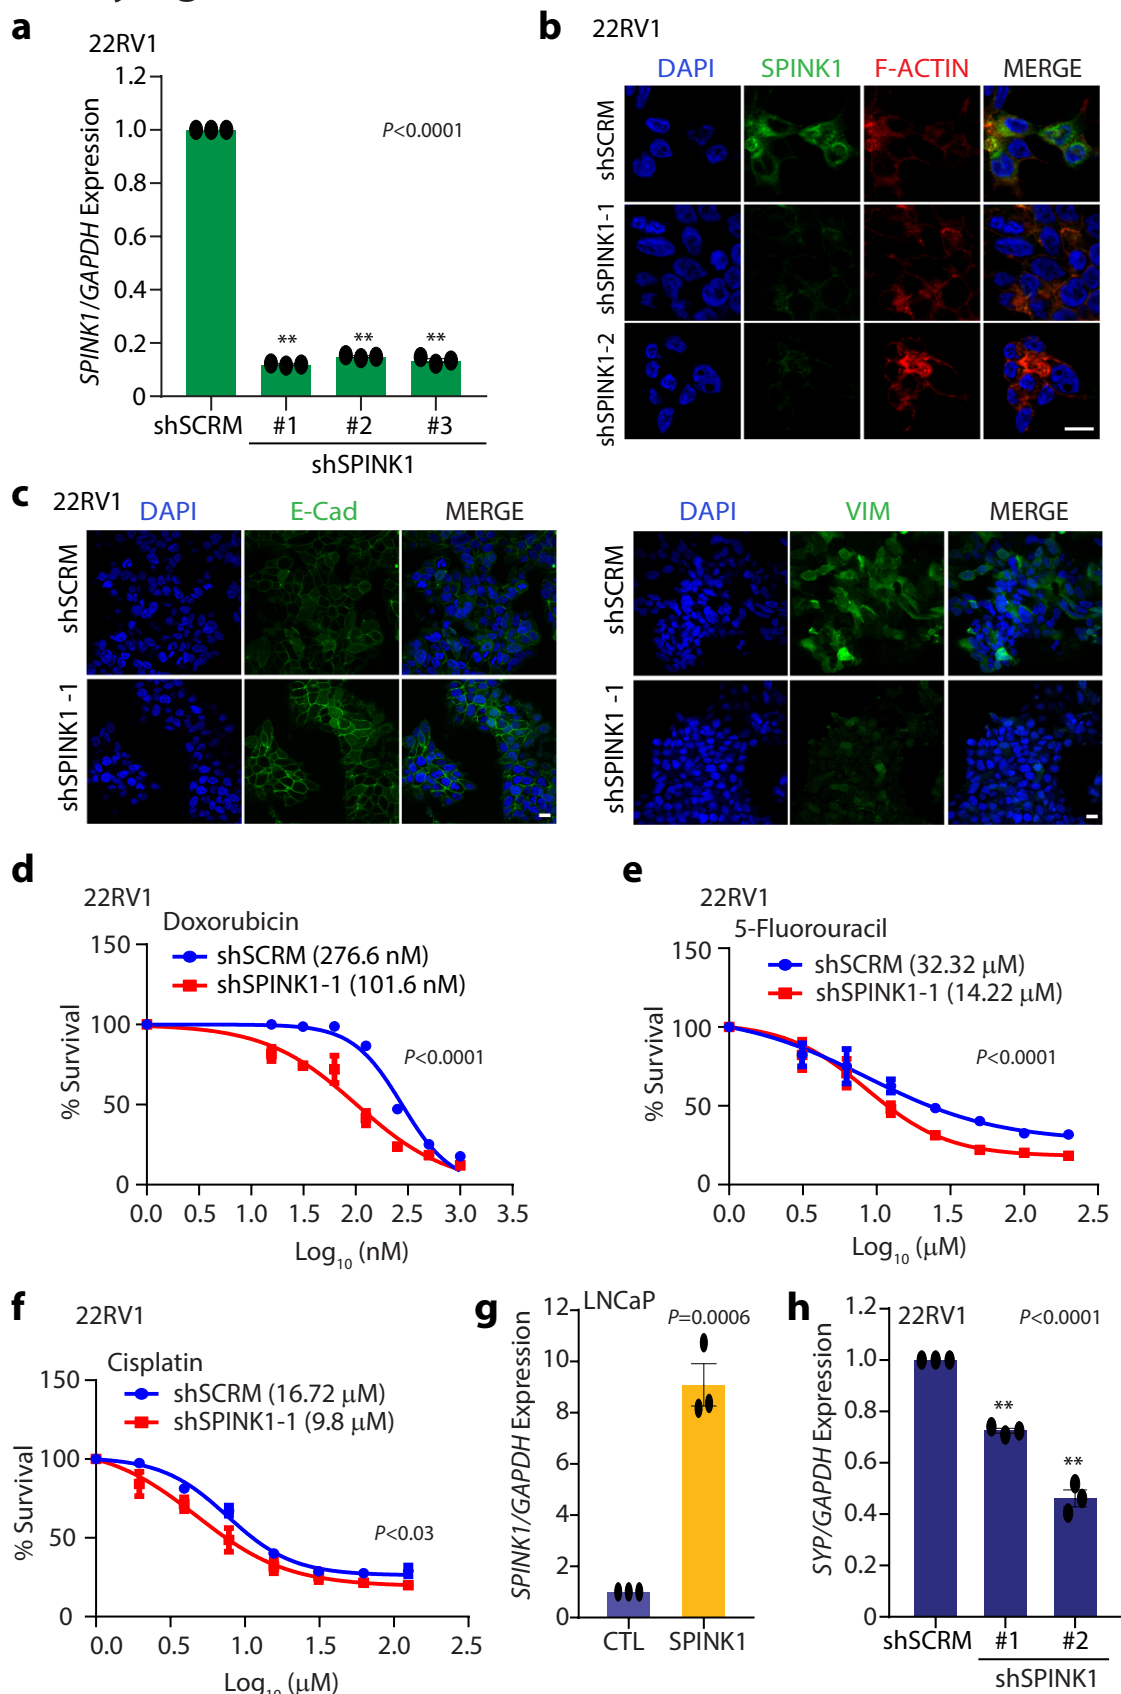

### Supplementary Figure 5. Knockdown of *SPINK1* attenuates epithelial–mesenchymal transition and stemness in PCa cells.

(a) QPCR data showing relative expression of *SPINK1* in stable *SPINK1*-silenced 22RV1 cells using three independent shRNA against *SPINK1*. (b) Immunostaining for *SPINK1* using same cells as in (a). F-actin and nucleus was stained using TRITC-phalloidin and DAPI respectively. Scale bar represents 10 μm. (c) Immunostaining for E-Cad (left) and VIM (right) using same cells as in (a). Scale bar represents 20 μm (d) Dose-response curve with a range of doxorubicin concentration using control 22RV1-shSCRM ( $IC_{50} = 276.6$  nM, 95% CI = 244.7 to 312.8 nM) and 22RV1-shSPINK1 ( $IC_{50} = 101.6$  nM, 95% CI = 84.33 to 122.4 nM) cells. (e) Same as in (d) except, 5-fluorouracil using control 22RV1-shSCRM ( $IC_{50} = 32.32$  μM, 95% CI = 24.51 to 42.63 μM) and 22RV1-shSPINK1 ( $IC_{50} = 14.22$  μM, 95% CI = 11.14 to 18.15 μM) cells. (f) Same as in (d) except, cisplatin using control 22RV1-shSCRM ( $IC_{50} = 16.72$  μM, 95% CI = 12.32 to 22.70 μM) and 22RV1-shSPINK1 ( $IC_{50} = 9.8$  μM, 95% CI = 7.491 to 12.84 μM) cells. (g) QPCR data showing relative expression of *SPINK1* in stable *SPINK1* overexpressing LNCaP cells. (h) QPCR data showing relative expression of *SYP* in 22RV1-shSCRM and 22RV1-shSPINK1 cells. Experiments were performed with  $n=3$  biologically independent samples; data represents mean  $\pm$  SEM. For panels (a, h) one-way ANOVA, Dunnett's multiple comparison test; (d-g) two tailed unpaired students *t*-test. \* $P \leq 0.05$  and \*\* $P \leq 0.001$ .

# Supplementary Figure 6

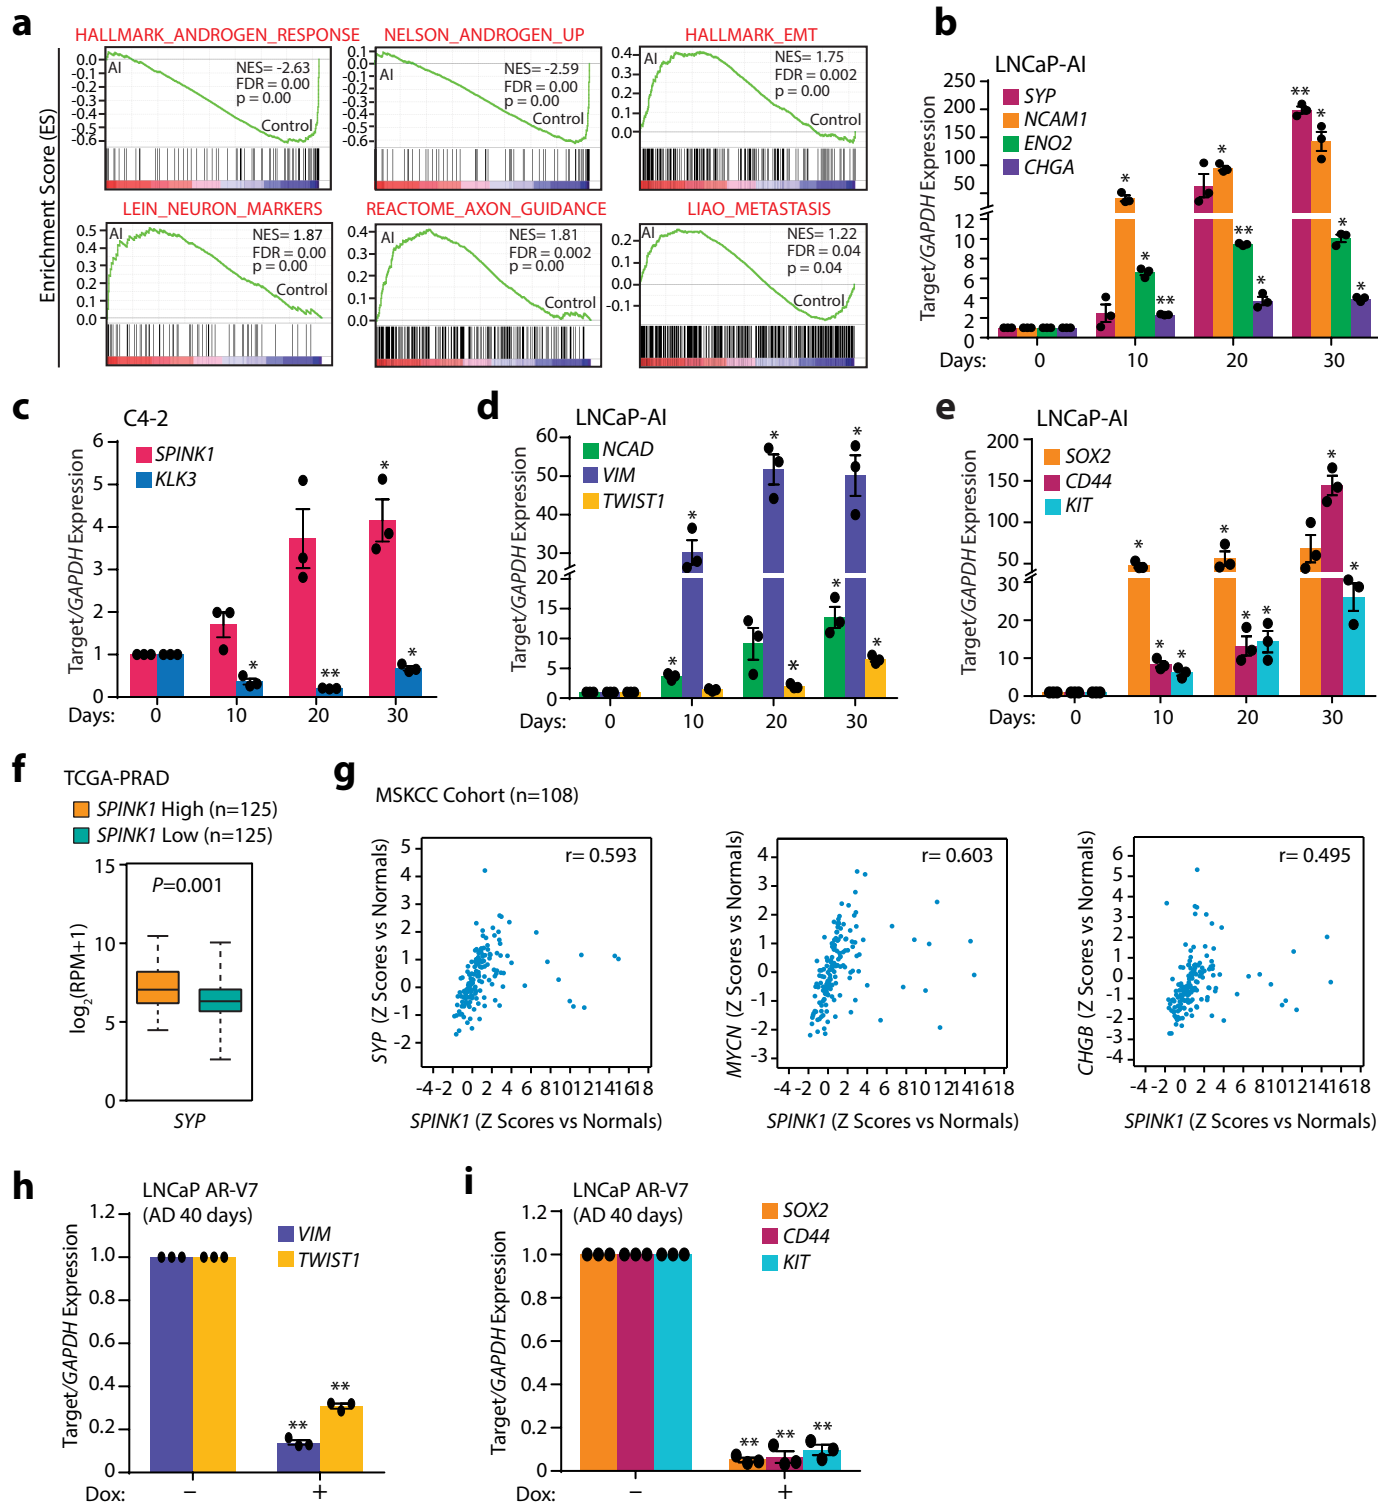

## Supplementary Figure 6. SPINK1 expression is positively correlated with neuroendocrine prostate cancer (NEPC) signature genes.

**(a)** Gene Set Enrichment Analysis (GSEA) plots showing gene signatures associated with androgen signaling, neuroendocrine phenotype and EMT with the corresponding statistical metrics in long-term androgen deprived LNCaP cells relative to control cells (GSE8702). **(b)** QPCR data showing relative expression of *SYP*, *CHGA*, *ENO2*, and *NCAM1* in long-term androgen deprived (30 days) LNCaP-AI cells. **(c)** Same as in (b), except relative expression of *SPINK1* and *KLK3* in long-term androgen deprived C4-2 cells, a metastatic subtype derived from LNCaP-C4. **(d)** Same as in (b), except relative expression of *NCAD*, *VIM*, and *TWIST1*. **(e)** Same as in (b), except relative expression of *CD44*, *SOX2*, *KIT*. **(f)** Expression of *SYP* in *SPINK1* high (n=125) and *SPINK1* low (n=125) PCa patients, stratified by employing quartile-based normalization of *SPINK1* expression in TCGA-PRAD dataset. Transcripts level shown as log<sub>2</sub> (RPM+1). **(g)** Correlation plots between *SPINK1* and *SYP*, *CHGB* and *MYCN* mRNA Z-score in MSKCC PCa cohort (n=108) analysed using cBioportal. Spearman's correlation coefficient (r) is indicated. **(h)** QPCR data showing relative expression of *VIM* and *TWIST1* in long-term androgen deprived (AD; 40 days) doxycycline-inducible LNCaP AR-V7 overexpressing cells, cultured in presence of doxycycline for 40 day. **(i)** Same as in (h), except relative expression of *CD44*, *SOX2* and *KIT*.

Experiments were performed with n=3 biologically independent samples; data represents mean ± SEM. For panels (b-f) two-tailed unpaired Student's t-test; (h-i) two-way ANOVA, Sidak's multiple comparison test was applied. \*P ≤ 0.05 and \*\*P ≤ 0.001. For panel (f) data is presented as box-and-whisker plots with median, where the box extends from 25th-75th percentile, and whiskers ranges from minimum and maximum values.

## Supplementary Figure 7

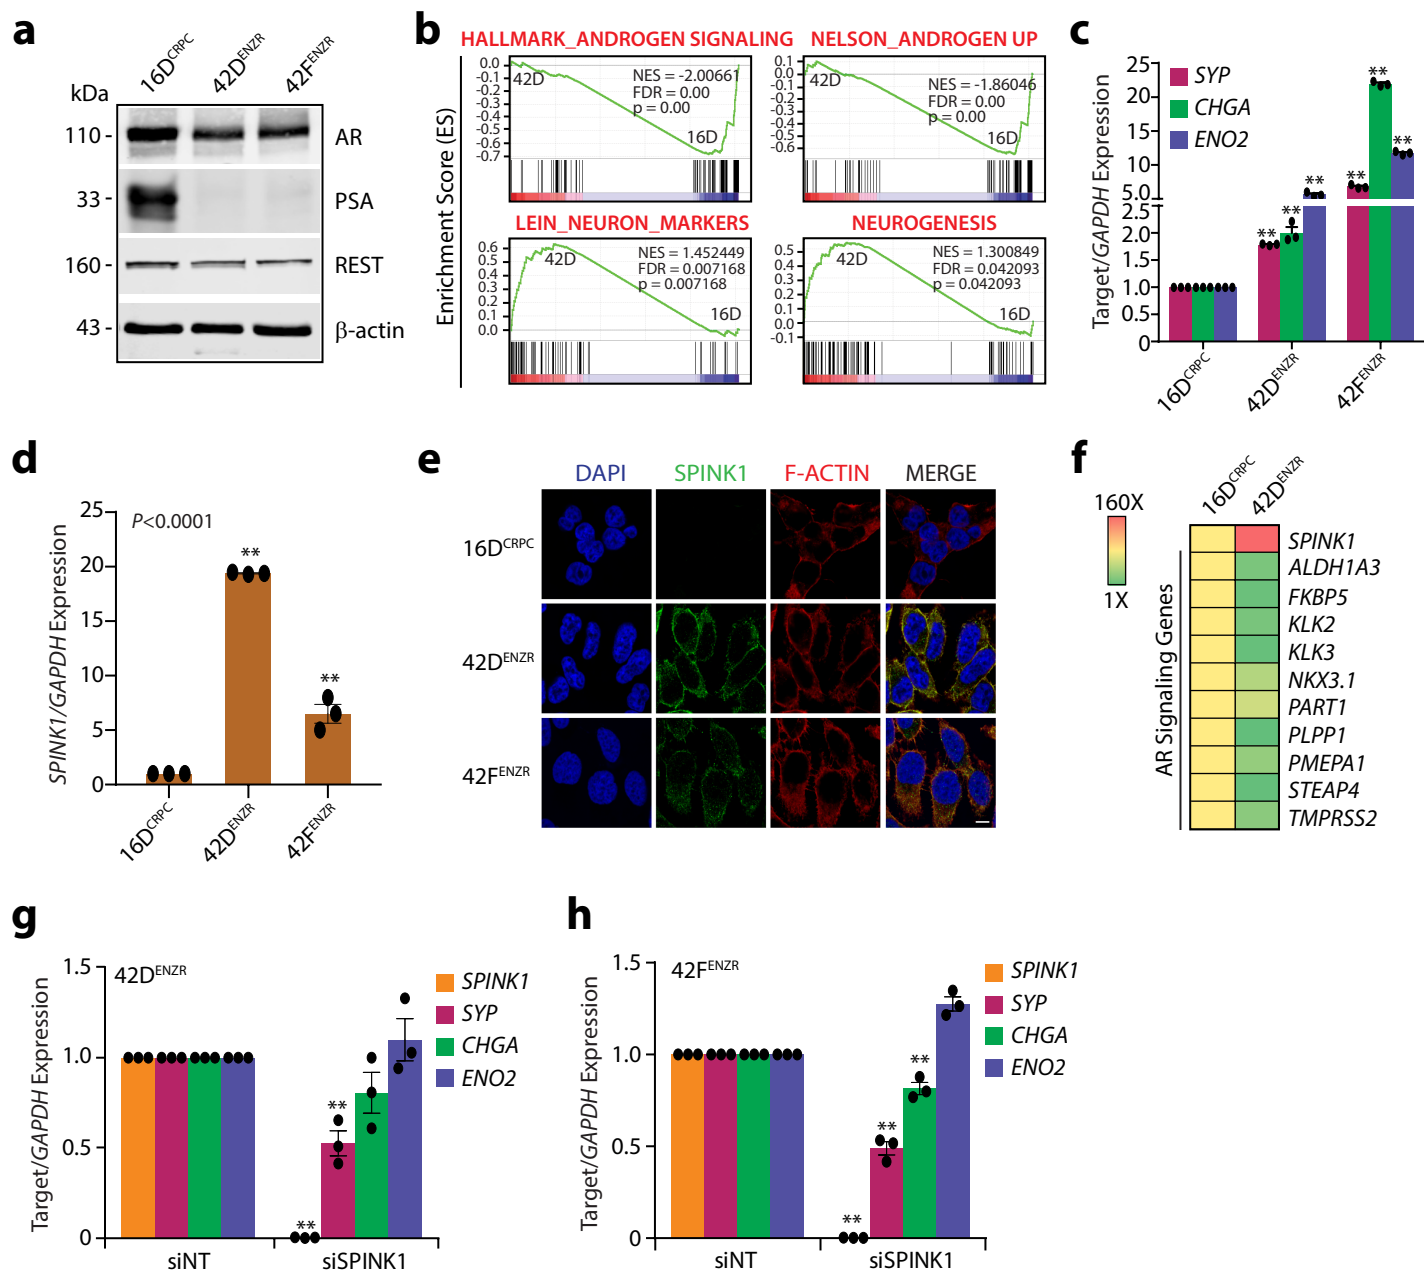

### Supplementary Figure 7. Enzalutamide-resistant tumors show higher expression of SPINK1.

(a) Immunoblot assay for AR, PSA and REST levels in LNCaP xenografts derivatives, namely 16D<sup>CRPC</sup> and enzalutamide resistant 42D<sup>ENZR</sup> and 42F<sup>ENZR</sup> cell lines.  $\beta$ -actin was used as a loading control. (b) Gene Set Enrichment Analysis (GSEA) plots showing gene signatures associated with androgen signaling and neuroendocrine phenotype with the corresponding statistical metrics in the 42D<sup>ENZR</sup> cells compared to 16D<sup>CRPC</sup>. (c) QPCR data showing relative expression of *SYP*, *CHGA* and *ENO2* in 16D<sup>CRPC</sup>, 42D<sup>ENZR</sup> and 42F<sup>ENZR</sup> cells. (d) Same as in (c), except expression of *SPINK1*. (e) Immunostaining for *SPINK1* using the same cells as in (c). Scale bar represents 10 $\mu$ m. (f) Heatmap representing fold increase in *SPINK1* transcript versus AR target genes in 42D<sup>ENZR</sup> cells compared to 16D<sup>CRPC</sup>. Data is plotted as reads per million. (g) QPCR data showing relative expression of *SPINK1*, *SYP*, *CHGA* and *ENO2* in siRNA mediated *SPINK1* silenced 42D<sup>ENZR</sup> cells. (h) Same as in (g), except 42F<sup>ENZR</sup> cells were used.

Experiments were performed with  $n=3$  biologically independent samples; data represents mean  $\pm$  SEM. For panel (c) two-way ANOVA, Dunnett's multiple comparison test; (d) one-way ANOVA, Dunnett's multiple comparison test; (g-h) two-way ANOVA, Sidak's multiple comparisons test was applied. \* $P \leq 0.05$  and \*\* $P \leq 0.001$ . Source data for (a) are provided as a Source Data file.



## Supplementary Figure 8

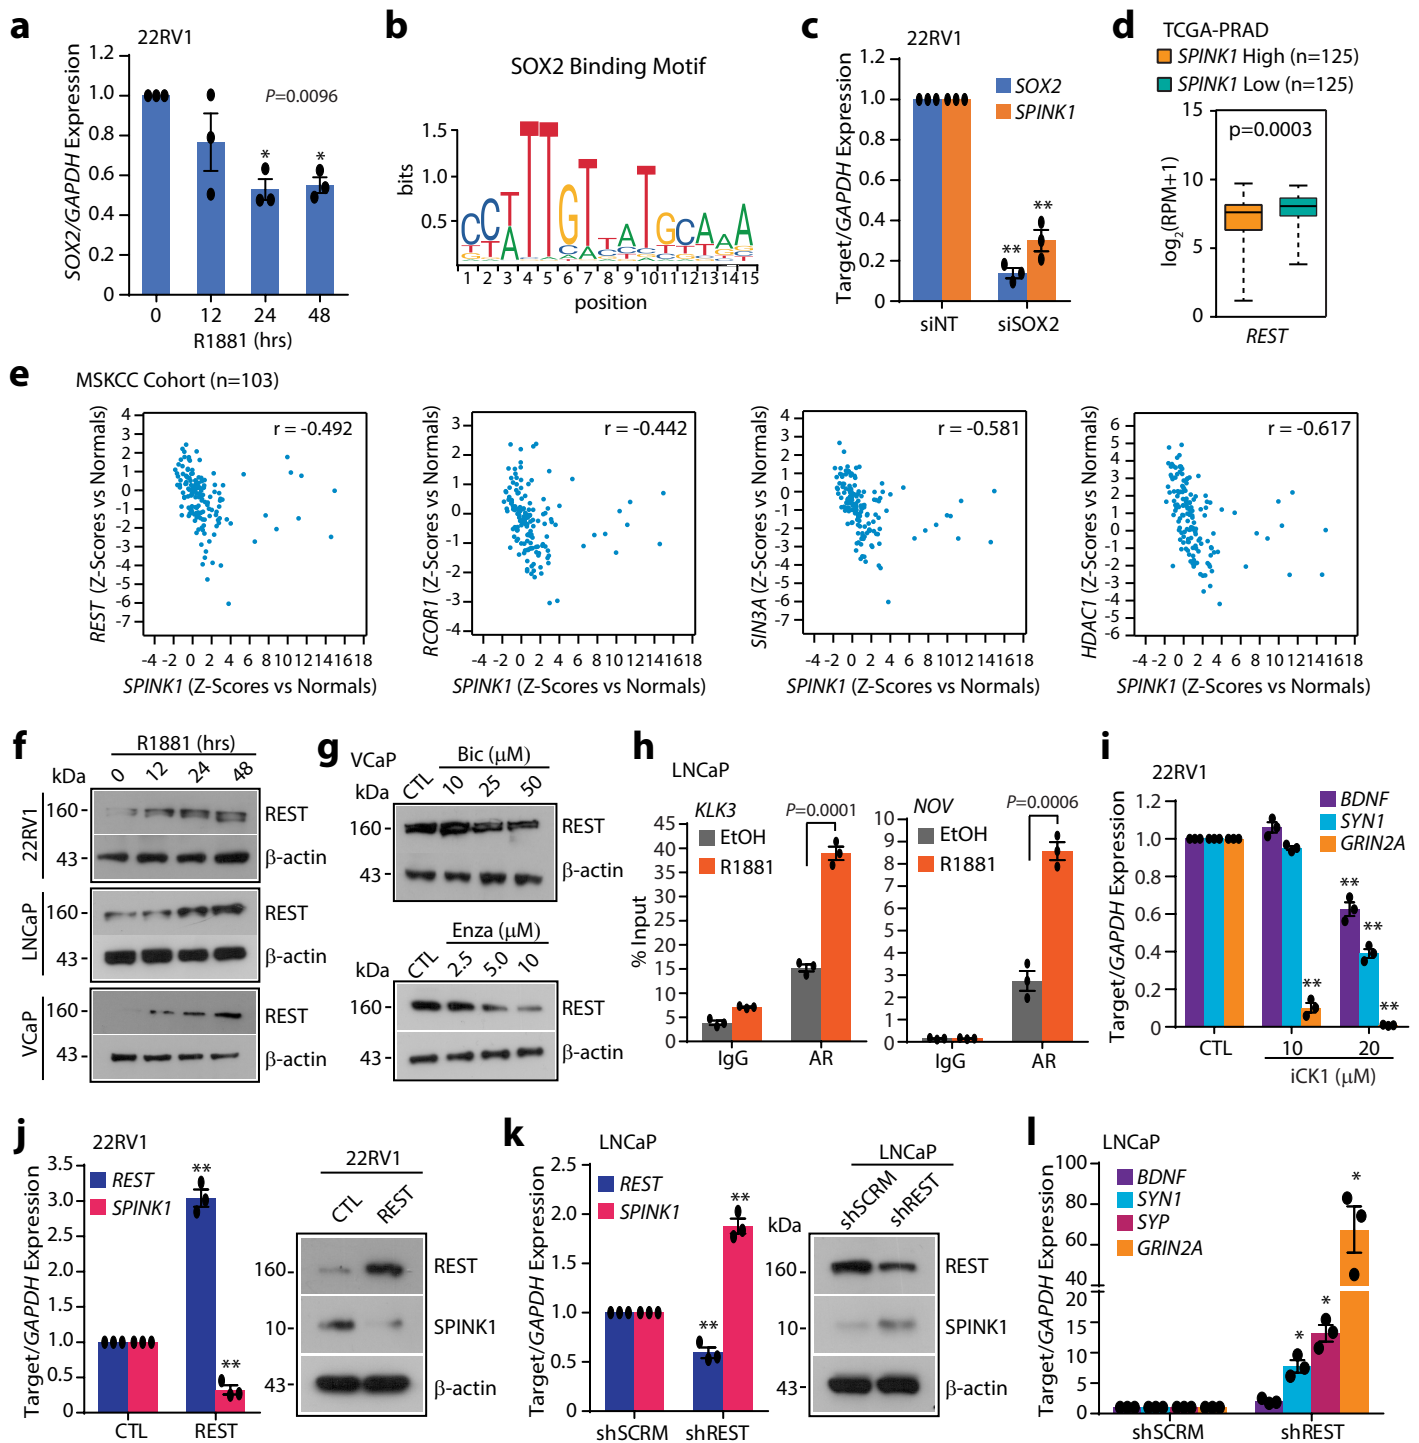

### Supplementary Figure 8. REST serves as a transcriptional co-repressor of AR and negatively regulates SPINK1 expression.

(a) QPCR data showing relative expression of *SOX2* in androgen (R1881; 10 nM) stimulated 22RV1 cells. (b) Schema showing *SOX2* binding motif constructed from JASPAR database. (c) QPCR data showing relative expression of *SOX2* and *SPINK1* in siRNA mediated *SOX2* silenced 22RV1 cells with respect to control. (d) Relative expression of *REST* across *SPINK1* high (n=125) and *SPINK1* low (n=125) PCa patients, stratified by employing quartile-based normalization of *SPINK1* expression in TCGA-PRAD dataset. Transcripts level shown as  $\log_2(\text{RPM}+1)$ . (e) Correlation plots between *SPINK1* and *REST*, *RCOR1*, *SIN3A* and *HDAC1* mRNA Z-Scores in MSKCC PCa cohort (n=103) analyzed using cBioPortal. Spearman's correlation coefficient (r) indicated. (f) Immunoblot analysis for REST level in 22RV1, LNCaP and VCaP cells upon androgen (R1881; 10 nM) stimulation.  $\beta$ -actin was used as a loading control. (g) Same as in (f), except anti-androgens (bicalutamide and enzalutamide) treated VCaP cells were used.  $\beta$ -actin was used as a loading control. (h) ChIP-qPCR data showing recruitment of AR on the *KLK3* and *NOV* promoters in androgen (R1881; 10 nM) stimulated LNCaP cells. (i) QPCR data showing relative expression of REST regulated genes, *BDNF*, *SYN1* and *GRIN2A* in 22RV1 cells treated with Casein Kinase 1 inhibitor (iCK1) at the indicated concentrations. (j) QPCR data showing relative expression of *REST* and *SPINK1* in stable REST overexpressing 22RV1 cells (left). Immunoblot assay for *SPINK1* and *REST* using the same cells (right).  $\beta$ -actin was used as a loading control. (k) Same as in (j) except, stable *SPINK1*-silenced LNCaP cells were used. (l) QPCR data showing relative expression of REST regulated genes, *BDNF*, *SYN1*, *SYP* and *GRIN2A* using same cells as in (k).

Experiments were performed with n=3 biologically independent samples; data represents mean  $\pm$  SEM. For panels (a) one-way ANOVA, Dunnett's multiple comparison test; (c) two-way ANOVA, Dunnett's multiple comparison test; (d, h) two-tailed unpaired Student's t-test; (i-l) two-way ANOVA, Sidak's multiple comparisons test was applied.  $*P \leq 0.05$  and  $**P \leq 0.001$ . For panel (d) data is presented as box-and-whisker plots with median, where the box extends from 25<sup>th</sup>-75<sup>th</sup> percentile, and whiskers ranges from minimum and maximum values. Source data for (f, g, j, k) are provided as a Source Data file.

## Supplementary Figure 9

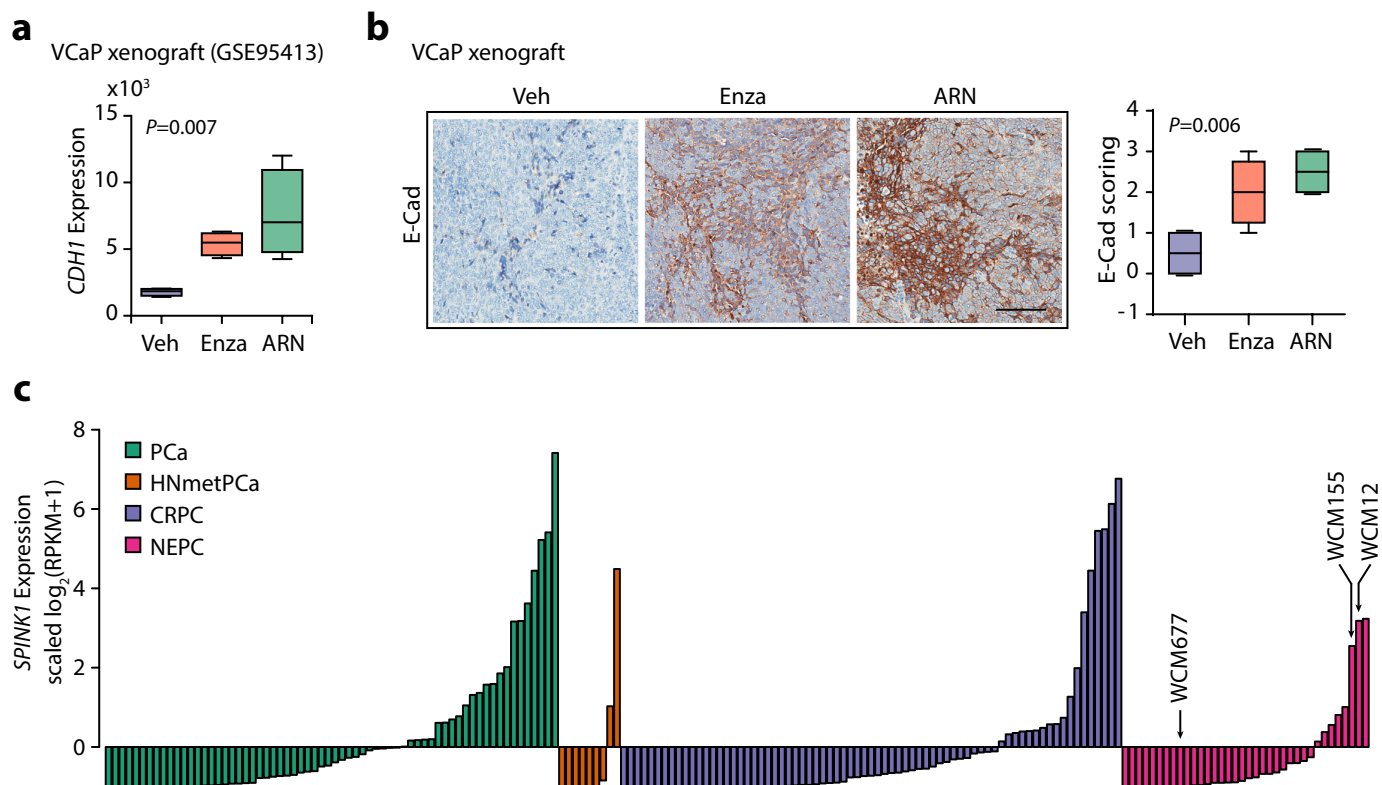

### Supplementary Figure 9. SPINK1 expression in associated with NE-like features in ADT-administered mice and NEPC patients.

(a) Box plot depicting relative expression of *CDH1* transcripts (read counts) in VCaP tumors implanted orthotopically in orchietomized mice, and administered with vehicle (n=4) or anti-androgens [enzalutamide (n=4) or ARN-509 (n=4)] treatment for 4 weeks (GSE95413). (b) Representative images of immunohistochemical staining for E-Cad (left panel) and quantification of the staining (right panel) in VCaP tumors treated with vehicle (n=4) or anti-androgens [enzalutamide (n=4) or ARN-509 (n=4)] for 4 weeks as in (a). Scale bar represents 100 $\mu\text{m}$ . (c) *SPINK1* expression in prostate adenocarcinoma (PCa, n=66), hormone naive metastatic prostate cancer (HNmetPCa, n=9), castrate-resistant prostate cancer (CRPC, n=73) and neuroendocrine prostate cancer (NEPC, n=36) clinical specimens in Beltran cohort.

Data are presented as box-and-whisker plots with median, where the box extends from 25th-75th percentile, and whiskers ranges from minimum and maximum values. For panels (a, b) one-way ANOVA, Dunnett's multiple comparisons test was applied.

**Supplementary Table 1: Downregulated biological processes in 22RV1 shSPINK1 cells predicted by DAVID analysis.**

| Category         | Term                                                                            | Count | P- Value  | Genes                                                                                                                                                                                                                          | Fold Enrichment | Bonferroni | Benjamini   | FDR     |
|------------------|---------------------------------------------------------------------------------|-------|-----------|--------------------------------------------------------------------------------------------------------------------------------------------------------------------------------------------------------------------------------|-----------------|------------|-------------|---------|
| GOTERM_BP_DIRECT | GO:0007399~nervous system development                                           | 15    | 0.0016934 | CXCL1, EFN3, MAFB, MBD5, INHA, PCDHB12, MYT1, MDK, GJB1, PCDH18, SEMA6A, APBA2, APAF1,                                                                                                                                         | 2.651452151     | 0.95832451 | 0.958324511 | 2.85061 |
| GOTERM_BP_DIRECT | GO:0045944~positive regulation of transcription from RNA polymerase II promoter | 33    | 0.0034502 | E2F4, E2F5, HCFC1, ELK1, NFKB2, SKAP1, SRF, TGFB1, CALCOCO1, NR1H2, HOXA2, TEF, POU4F2, NRG1, ZNF564, EGFR, ARHGEF2, RARG, RXRB, MAFB, NODAL, NKX2-8, TEAD2, KLF15, TET1, USF1, JUNB, SIRT2, SREBF2, SMO, CAMK1, TFAP2D, FOXC1 | 1.706551364     | 0.99846657 | 0.960841005 | 5.72689 |
| GOTERM_BP_DIRECT | GO:0034097~response to cytokine                                                 | 6     | 0.0034698 | MCL1, SYNJ1, NFKB2, BCL2L1, SRF, JUNB                                                                                                                                                                                          | 5.853590518     | 0.99852223 | 0.886096791 | 5.7586  |
| GOTERM_BP_DIRECT | GO:0048143~astrocyte activation                                                 | 3     | 0.0037024 | EGFR, SMO, ADORA2A                                                                                                                                                                                                             | 30.43867069     | 0.99904596 | 0.824251675 | 6.13315 |
| GOTERM_BP_DIRECT | GO:0048384~retinoic acid receptor signaling                                     | 4     | 0.0049298 | NR1H2, RARG, ACTN4, RXRB                                                                                                                                                                                                       | 11.27358174     | 0.99990543 | 0.843271145 | 8.08702 |
| GOTERM_BP_DIRECT | GO:0010507~negative regulation of autophagy                                     | 5     | 0.0052552 | MCL1, RNF5, BCL2L1, SIRT2, MT3                                                                                                                                                                                                 | 7.045988587     | 0.99994878 | 0.807291349 | 8.59856 |
| GOTERM_BP_DIRECT | GO:2001240~negative regulation of extrinsic apoptotic signaling                 | 5     | 0.0058025 | MCL1, STRADB, BCL2L1, CX3CL1, NRG1                                                                                                                                                                                             | 6.855556463     | 0.99998175 | 0.789606802 | 9.45296 |
| GOTERM_BP_DIRECT | GO:0006357~regulation of transcription from RNA polymerase II                   | 18    | 0.0065717 | NFE2, BATF2, TBX10, NFKBID, MAFB, TADA1, NFKB2, ZBED8, TCEAL2, USF1, JUNB, FEV, MED30,                                                                                                                                         | 2.07065787      | 0.99999572 | 0.786758291 | 10.6409 |
| GOTERM_BP_DIRECT | GO:0001666~response to hypoxia                                                  | 10    | 0.0070417 | CYBA, ACTN4, RYR1, CYTB, CHRNA7, APAF1, USF1, SRF, TGFB1,                                                                                                                                                                      | 2.949483594     | 0.99999824 | 0.770580637 | 11.3595 |
| GOTERM_BP_DIRECT | GO:0042981~regulation of apoptotic process                                      | 11    | 0.009646  | PEA15, MCL1, ACTN4, CASP8, APAF1, GAS1, INHA, BCL2L1,                                                                                                                                                                          | 2.619916883     | 0.99999999 | 0.837551712 | 15.244  |
| GOTERM_BP_DIRECT | GO:0048012~hepatocyte growth factor                                             | 3     | 0.0126525 | HPN, MST1R, SIRT2                                                                                                                                                                                                              | 16.91037261     | 1          | 0.885871225 | 19.5291 |
| GOTERM_BP_DIRECT | GO:0032930~positive regulation of                                               | 3     | 0.0126525 | EGFR, CYBA, TGFB1                                                                                                                                                                                                              | 16.91037261     | 1          | 0.885871225 | 19.5291 |
| GOTERM_BP_DIRECT | GO:0045930~negative regulation of mitotic                                       | 4     | 0.0139929 | EGFR, FOXC1, GAS1, TGFB1                                                                                                                                                                                                       | 7.804787358     | 1          | 0.889400469 | 21.3731 |
| GOTERM_BP_DIRECT | GO:0019827~stem cell population                                                 | 5     | 0.016594  | MED30, NODAL, LIN28A, TET1, ZNF358                                                                                                                                                                                             | 5.073111782     | 1          | 0.910493435 | 24.8384 |
| GOTERM_BP_DIRECT | GO:0030203~glycosaminoglycan metabolic                                          | 4     | 0.0188359 | GPC5, CHST9, FOXC1, SDC3                                                                                                                                                                                                       | 6.997395562     | 1          | 0.921662288 | 27.7093 |
| GOTERM_BP_DIRECT | GO:0045773~positive regulation of axon                                          | 4     | 0.0206309 | ANAPC2, NRG1, SRF, DISC1                                                                                                                                                                                                       | 6.764149043     | 1          | 0.926158438 | 29.9331 |
| GOTERM_BP_DIRECT | GO:0045766~positive regulation of                                               | 7     | 0.0260231 | CCL11, CD34, NODAL, CXCR2, CHRNA7, CX3CL1, ANXA3                                                                                                                                                                               | 3.087981085     | 1          | 0.954496499 | 36.2326 |
| GOTERM_BP_DIRECT | GO:0043588~skin                                                                 | 4     | 0.0287174 | JUP, RYR1, ITGA3, SLITRK5                                                                                                                                                                                                      | 5.968366803     | 1          | 0.959793655 | 39.1767 |
| GOTERM_BP_DIRECT | GO:0010628~positive regulation of gene                                          | 11    | 0.0347939 | SMO, HPN, CD34, PRKAG1, HCFC1, ITGA3, WNT6, TGFB1, CALCOCO1,                                                                                                                                                                   | 2.129932428     | 1          | 0.975000956 | 45.3535 |
| GOTERM_BP_DIRECT | GO:0038128~ERBB2                                                                | 4     | 0.0382437 | EGFR, NRG4, PTPRR, NRG1                                                                                                                                                                                                        | 5.340117666     | 1          | 0.978680006 | 48.5923 |
| GOTERM_BP_DIRECT | GO:0006695~cholesterol biosynthetic process                                     | 4     | 0.0382437 | TM7SF2, MSMO1, LSS, IDI1                                                                                                                                                                                                       | 5.340117666     | 1          | 0.978680006 | 48.5923 |
| GOTERM_BP_DIRECT | GO:0042307~positive regulation of protein                                       | 3     | 0.0385348 | JUP, SMO, TGFB1                                                                                                                                                                                                                | 9.512084592     | 1          | 0.97487987  | 48.8572 |
| GOTERM_BP_DIRECT | GO:0048168~regulation of neuronal synaptic                                      | 3     | 0.0385348 | SYP, ARC, DBN1                                                                                                                                                                                                                 | 9.512084592     | 1          | 0.97487987  | 48.8572 |
| GOTERM_BP_DIRECT | GO:0007010~cytoskeleton organization                                            | 8     | 0.0400267 | CCL11, DMTN, SEMA6A, FMNL2, ARC, MAEA, CFL1, PSTPIP2                                                                                                                                                                           | 2.520800886     | 1          | 0.973938627 | 50.1945 |
| GOTERM_BP_DIRECT | GO:0050908~detection of light stimulus                                          | 3     | 0.043117  | SEMA5B, GNAT2, CACNA2D4                                                                                                                                                                                                        | 8.952550204     | 1          | 0.976630451 | 52.8608 |
| GOTERM_BP_DIRECT | GO:0007268~chemical synaptic transmission                                       | 10    | 0.0481264 | SSTR5, PDE7B, NPY, SSTR1, HTR6, SDCBP, MINK1, APBA2, SLITRK5,                                                                                                                                                                  | 2.113796576     | 1          | 0.982063137 | 56.8992 |
| GOTERM_BP_DIRECT | GO:0071300~cellular response to retinoic                                        | 5     | 0.0488791 | HOXA2, RARG, TEAD2, SNRNP70, WNT6                                                                                                                                                                                              | 3.623651273     | 1          | 0.980062683 | 57.4771 |

**Supplementary Table 2: List of Primers.**

| <b>Quantitative PCR (qPCR) Primers</b> |                  |                    |                           |
|----------------------------------------|------------------|--------------------|---------------------------|
| <b>S. No.</b>                          | <b>Gene Name</b> | <b>Primer Name</b> | <b>Sequence (5'-3')</b>   |
| 1                                      | <i>SPINK1</i>    | qSPINK1_FP         | GTCTGTGGGACTGATGGAAATA    |
|                                        |                  | qSPINK1_RP         | GAGGATAGAAGTCTGGCGTTTC    |
| 2                                      | <i>AR</i>        | qAR_FP             | AATCCCACATCCTGCTCAAG      |
|                                        |                  | qAR_RP             | GAGTCCAGGAGCTTGGTGAG      |
| 3                                      | <i>KLK3</i>      | qPSA_FP            | GTCTGCGGGCGGTGTTCTG       |
|                                        |                  | qPSA_RP            | TGCCGACCCAGCAAGATC        |
| 4                                      | <i>TMPRSS2</i>   | qTMPRSS2_FP        | CAGGAGTGTACGGGAATGTGATGGT |
|                                        |                  | qTMPRSS2_RP        | GATTAGCCGTCTGCCCTCATTTGT  |
| 5                                      | <i>ERG</i>       | qERG_FP            | CGCAGAGTTATCGTGCCAGCAGAT  |
|                                        |                  | qERG_RP            | CCATATTCTTTCACCGCCCACTCC  |
| 6                                      | <i>FKBP5</i>     | qFKBP_FP           | GCAGGCGGTGATTCAGTAT       |
|                                        |                  | qFKBP_RP           | AGG TTCAGAAAGGCAGCAA      |
| 7                                      | <i>SOX2</i>      | qSOX2_FP           | CATGGGTTCGGTGGTCAAG       |
|                                        |                  | qSOX2_RP           | TGATCATGTCCCGGAGGT        |
| 8                                      | <i>SYP</i>       | qSYP_FP            | CCTCTGCTATGTCTGTGATGTC    |
|                                        |                  | qSYP_RP            | TACCGAAGGGTTTGGGAAAG      |
| 9                                      | <i>CHGA</i>      | qCHGA_FP           | CTGAACACAGGCAGCTTTCTA     |
|                                        |                  | qCHGA_RP           | CAGTCAGGAGTTCTCAGCTTTC    |
| 10                                     | <i>ENO2</i>      | qENO2_FP           | AGTTCACAGCCAATGTAGGG      |
|                                        |                  | qENO2_RP           | CCGATCTGGTTGACCTTGAG      |
| 11                                     | <i>NCAM1</i>     | qNCAM1_FP          | ACCAGACTGCCATGGAATTAG     |
|                                        |                  | qNCAM1_RP          | GCTGATGTTCCGGGTAGAAG      |
| 12                                     | <i>CDH2</i>      | qN-CAD_FP          | TGACTCCCTGTTAGTGTTTGAC    |
|                                        |                  | qN-CAD_RP          | CCCAGTCGTT CAGGTAATCATAG  |
| 13                                     | <i>VIMENTIN</i>  | qVIM_FP            | GATTCACTCCCTCTGGTTGATAC   |
|                                        |                  | qVIM_RP            | GTCATCGTGATGCTGAGAAGT     |
| 14                                     | <i>TWIST1</i>    | qTWIST1_FP         | CCAGGTACATCGACTTCCTCTA    |
|                                        |                  | qTWIST1_RP         | CCATCCTCCAGACCGAGAA       |
| 15                                     | <i>CD44</i>      | qCD44_FP           | CAGCACTTCAGGAGGTTACAT     |
|                                        |                  | qCD44_RP           | GTAGCAGGGATTCTGTCTGTG     |
| 16                                     | <i>KIT</i>       | qKIT_FP            | CAAGGCTTCTCCAATTCTGC      |
|                                        |                  | qKIT_RP            | TGCAGTGGTCCACAGAAGAG      |
| 17                                     | <i>REST</i>      | qREST_FP           | AGAGAAGAGGCATCAGGAGA      |
|                                        |                  | qREST_RP           | ATTAGCAGCAAGACCAGGTAG     |
| 18                                     | <i>BDNF</i>      | qBDNF_FP           | GCGTGTGTGACAGTATTAGT      |
|                                        |                  | qBDNF_RP           | CTGGGTAGTTCGGCACTGGG      |
| 19                                     | <i>SYN1</i>      | qSYN1_FP           | GCACGTCCTGGCTGGGTTTCTGGG  |
|                                        |                  | qSYN1_RP           | AGGCTACCCGTCAGACATCCGTCTC |
| 20                                     | <i>GRIN2A</i>    | qGRIN2A-FP         | GTGGTCTATCAACGGGCAGT      |
|                                        |                  | qGRIN2A-RP         | AGGTGAGACGGTGCCATTAC      |
| 21                                     | <i>GAPDH</i>     | qGAPDH_FP          | TGCACCACCAACTGCTTAGC      |
|                                        |                  | qGAPDH_RP          | GGCATGGACTGTGGTCATGAG     |

|    |                 |              |                          |
|----|-----------------|--------------|--------------------------|
| 22 | <i>KLK2</i>     | qKLK2_FP     | CTCCATCTCCTGTCCAATGAC    |
|    |                 | qKLK2_RP     | AAGTGTCTTTACCACCTGTCC    |
| 23 | <i>ACSL3</i>    | qACSL3_FP    | GGGCCAAAGTGTGACAATGG     |
|    |                 | qACSL3_RP    | CGGGTTCAAACCTCCAATATCC   |
| 24 | <i>PIAS1</i>    | qPIAS1_FP    | AGTCTTCCACATCAAGCATCTC   |
|    |                 | qPIAS1_RP    | GGATGCCTATAGTCTTGGATGAG  |
| 25 | <i>PPAP2A</i>   | qPPAP2A_FP   | CCACACTGCAATTTGGTCTTG    |
|    |                 | qPPAP2A_RP   | CCCTGAATGAGTCCAGTCAAC    |
| 26 | <i>SLC26A2</i>  | qSLC26A2_FP  | GGAAGAAGGCAGCAAAGAGA     |
|    |                 | qSLC26A2_RP  | CTCCAAGGGATCATGGGAAAG    |
| 27 | <i>STK39</i>    | qSTK39_FP    | GGTCAAGTGGTCACCTTCATAA   |
|    |                 | qSTK39_RP    | CTTTCCTTCTTCGCTCTTCTC    |
| 28 | <i>STEAP4</i>   | qSTEAP4_FP   | GCCTGGCTCAGTGATTCATA     |
|    |                 | qSTEAP4_RP   | GCTAACAGATGGCAAAGAAGTG   |
| 29 | <i>DDC</i>      | qDDC_FP      | GCCCCTACTTCTTCGCCTAC     |
|    |                 | qDDC_RP      | CACAGTCTCCAGCTCTGTGC     |
| 30 | <i>OPRK1</i>    | qOPRK1_FP    | GCTGGACTCCCATTCACATATT   |
|    |                 | qOPRK1_RP    | GGATTCAGGCTACTGTTGGTATAG |
| 31 | <i>NOV</i>      | qNOV_FP      | ACCGTCAATGTGAGATGCTG     |
|    |                 | qNOV_RP      | TCTTGAACCTGCAGGTGGATG    |
| 32 | <i>SERPINI1</i> | qSERPINI1_FP | CTTGCTACTCTGGAGCCATTAG   |
|    |                 | qSERPINI1_RP | ACCTGGGCAGGTATACTTCTA    |

| <b>Chromatin Immunoprecipitation-Quantitative PCR (ChIP-qPCR) Primers</b> |                  |                    |                            |
|---------------------------------------------------------------------------|------------------|--------------------|----------------------------|
| <b>S. No.</b>                                                             | <b>Gene Name</b> | <b>Primer Name</b> | <b>Sequence (5'-3')</b>    |
| 1                                                                         | <i>SPINK1</i>    | ARE1_FP            | GAGTCTATCTGGTAAGTGTTCATA   |
|                                                                           |                  | ARE1_RP            | TCTCTCGAAGACTAGACTACATCAA  |
| 2                                                                         | <i>SPINK1</i>    | ARE2_FP            | CTGCACTAGATTTAGACCCTCAC    |
|                                                                           |                  | ARE2_RP            | GAGAAACATCCAGGAGGACAC      |
| 3                                                                         | <i>SPINK1</i>    | ARE3_FP            | GGCTGGCACCTGTTGAT          |
|                                                                           |                  | ARE3_RP            | CCAAATGTCAAGGAGGTCTCTAA    |
| 4                                                                         | <i>SPINK1</i>    | R1_FP              | CCATCTGCCATATGACCCTTC      |
|                                                                           |                  | R1_RP              | AGATGCCTGTTACCTTCATGG      |
| 5                                                                         | <i>SPINK1</i>    | R2_FP              | GGATTTCTCTGGTCAATGCAC      |
|                                                                           |                  | R2_RP              | CCTCACATGTCCAGGAATTA       |
| 6                                                                         | <i>SPINK1</i>    | R3_FP              | AGGTGCCAGCCCAATATC         |
|                                                                           |                  | R3_RP              | GCATGTCTATCTTTGGGAACTC     |
| 7                                                                         | <i>SPINK1</i>    | S1_FP              | GAGTCTATCTGGTAAGTGTTCATA   |
|                                                                           |                  | S1_RP              | TCTCTCGAAGACTAGACTACATCAA  |
| 8                                                                         | <i>SPINK1</i>    | S2_FP              | ACCCAGCACATATTCTCAGATG     |
|                                                                           |                  | S2_RP              | CTCAGTTCCTAAAGCGTGTAT      |
| 9                                                                         | <i>SPINK1</i>    | S3_FP              | ACATGGTCTTTGCCCTAGAAG      |
|                                                                           |                  | S3_RP              | AATACGTAATGTCTCCCTCTGC     |
| 10                                                                        | <i>KLK3</i>      | KLK3_FP            | CCTAGATGAAGTCTCCATGAGCTACA |
|                                                                           |                  | KLK3_RP            | GGGAGGGAGAGCTAGCACTTG      |

|    |            |        |                       |
|----|------------|--------|-----------------------|
| 11 | <i>NOV</i> | NOV_FP | GCTGAGTGGTTTCTCCTTGTC |
|    |            | NOV_RP | ACACCAGACAGCATGAGCAG  |

| <b>Mutagenesis Primers</b> |                  |                    |                         |
|----------------------------|------------------|--------------------|-------------------------|
| <b>S. No.</b>              | <b>Gene Name</b> | <b>Primer Name</b> | <b>Sequence (5'-3')</b> |
| 1                          | <i>SPINK1</i>    | MT1_FP             | GCTCAAGCACGAGTGTCTCCT   |
|                            |                  | MT1_RP             | AGGAGGACACTCGTGCTTGAGC  |
| 2                          | <i>SPINK1</i>    | MT2_FP             | GCTCAAGCACGAGTGGCCTCCT  |
|                            |                  | MT2_RP             | AGGAGGCCACTCGTGCTTGAGC  |
